# Supplementary material
Source: Research Square preprint supplement (doi:10.21203/rs.3.rs-9533494/v1)
Supplement: Supplementary file 1 [file f9d9f0c55b6f94e7d0b142f2.docx]

## **Appendix A**

***Understanding and Beliefs***

1. What does the word mental health and well-being mean to you?
2. In your opinion, do you think your child struggles mentally/ emotionally? What do you think your child struggles most with?
3. Has your child ever expressed interest in using mental health support services (school counsellor, mental health app, mental health professional). If so, could you please tell me more about this experience?
4. How old was your child when they expressed interest in these services?
5. What do you think would help them with those struggles?
6. As a parent, how did you support or advocate for your child in this moment?

***Use of Services***

1. Have any of you, as a parent, ever sought the use of a service (such as family physicians, psychologists, school counsellors, teachers, online-based services, community support groups, social workers, and allied health service providers) for your child? Which services have you sought and why?
2. Have you accessed any disability-specific services for your child, such as special education support, speech therapy, physical therapy, or occupational therapy? (Identifies disability service use alongside mental health.)
3. What, if any, disability accommodations are offered at your child's school, and how effective do you find them?
4. What challenges did you face in accessing these services? (e.g., language barriers, financial or transportation constraints, lack of information, cultural or familial beliefs)
5. Did you face any specific barriers in accessing disability-related services? (Clarifies specific obstacles in disability service access.)
6. What language were the services provided in? Were the services available in your preferred language? If not, how did that affect your experience?
7. Did you feel that the mental health professionals understood your cultural background and beliefs?
8. Did they adapt their approaches in a way that aligned with your cultural background and beliefs?

***Non-Use of Services***

1. For anyone in the group whose child had requested the use of service, but did not access one, would you be willing to share more on that particular experience? Could you please provide an example?
2. What barriers or concerns influenced your decision (such as finances, stigma, beliefs, language issues, lack of trust in services)?
3. Who would you include in your closest community? Are these individuals connected by any cultural backgrounds, or related by any disability or mental health experiences?
4. Do the people in your closest community discuss child mental health resources in Canada, if so, how?

***Satisfaction and Suggestions***

1. Are you satisfied with the support and services (both mental health or disability related services) your child received? Why or why not?
2. What improvements would you like to see to make mental health/disability services more accessible and effective to you?

***Knowledge and Awareness***

1. Was it easy to gain an understanding of the available mental health services/disability services for children in Canada?
